# Supplementary material for: Anion triggered and solvent assisted structural diversity and reversible single-crystal-to-single-crystal (SCSC) transformation between 1D and 2D coordination polymers
Source: Royal Society of Chemistry journal article supplement (doi:10.1039/c5ce00690b), 2015-01-01
Supplement: c5ce00690b1.pdf [file c5ce00690b1.pdf]

## **Electronic Supplementary Information (ESI)**

### **Anion Triggered and Solvent Assisted Structural Diversity and Reversible Single Crystal to Single Crystal (SCSC) transformation between 1D and 2D Coordination Polymers**

Sarita Tripathi, Renganathan Srirambalaji, Samir Patra and Ganapathi Anantharaman<sup>[a]\*</sup>

[a] Department of Chemistry, Indian Institute of Technology, Kanpur-208016, INDIA

1) The details during the course of the refinement of CP 2

The residual electron density is observed at 0.9653 0.2491 0.7362 which is 1.43 Å from N5.

2) The details during the course of the refinement of CP 4

H100 atom was located in difference map positions and refined positionally with DFIX restraint and DFIX 0.84 O1 H100 was given to fix with O1 atom.

H101 atom was located in difference map positions and refined positionally with DFIX restraint and DFIX 0.84 O1 H101 was given to fix with O1 atom.

Now, there are 3 distance or angle restraints and 3 least-squares restraints used in the refinement.

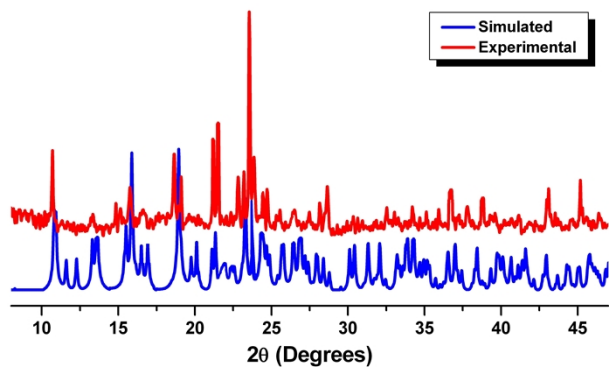

PXRD of CP 1

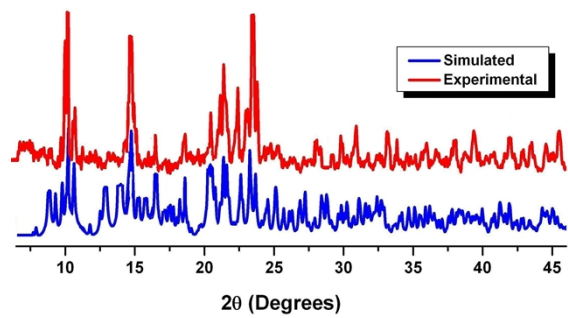

PXRD of CP 2

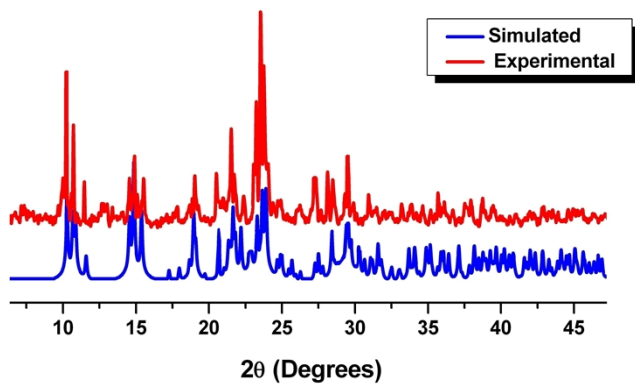

PXRD of CP 3

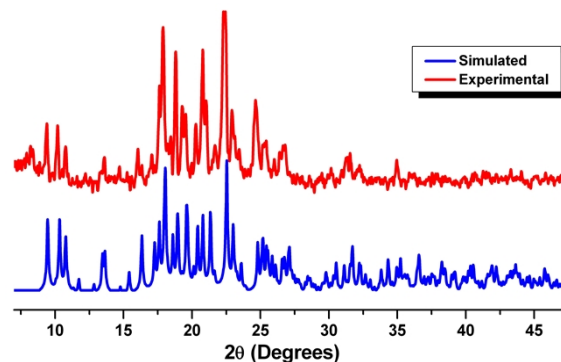

PXRD of CP 4

Figure S1. PXRD of CPs 1-4
